# Supplementary material for: Non-enzymatic electrochemical sensing of glucose and hydrogen peroxide using a bis(acetylacetonato)oxovanadium(iv) complex modified gold electrode
Source: Royal Society of Chemistry journal article supplement (doi:10.1039/c5ra26534g), 2016-01-01
Supplement: c5ra26534g1.pdf [file c5ra26534g1.pdf]

## Electronic Supplementary Information

### Non-enzymatic electrochemical sensing of glucose and hydrogen peroxide using bis(acetylacetonato)oxovanadium(IV) complex modified gold electrode

Koushik Barman and Sk Jasimuddin\*

Department of Chemistry, Assam University, Silchar, Assam -788011, India

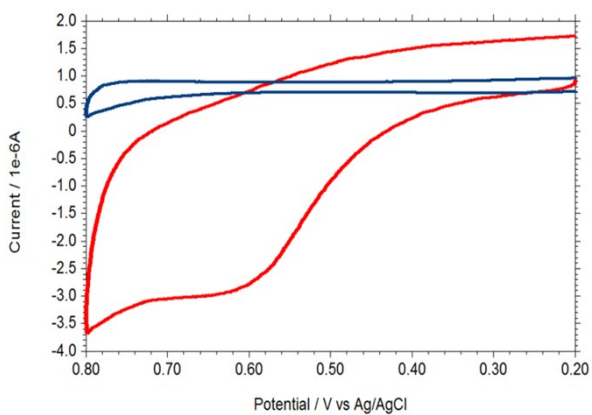

S1

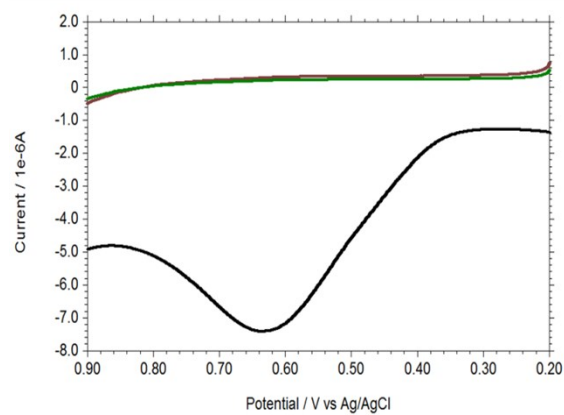

S2

**Figure S1.** Overlaid cyclic voltammogram obtained with (red curve) and without (blue curve) 0.1 mM glucose at the [VO(acac)<sub>2</sub>]-PATP-Au electrode in 0.1 M PBS solution (pH = 7.0).

**Figure S2.** Overlaid DPV obtained with bare (brown curve), PATP (green curve) and [VO(acac)<sub>2</sub>]-PATP (black curve) modified gold electrode in 0.1 mM glucose in 0.1 M PBS solution (pH = 7.0).

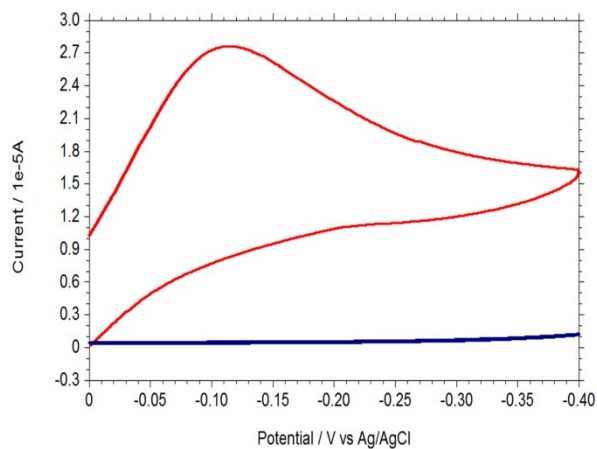

**Figure S3.** Overlaid cyclic voltammogram obtained with (red curve) and without (blue curve) 0.5 mM H<sub>2</sub>O<sub>2</sub> at the [VO(acac)<sub>2</sub>]-PATP-Au electrode in 0.1 M PBS solution (pH = 7.0).

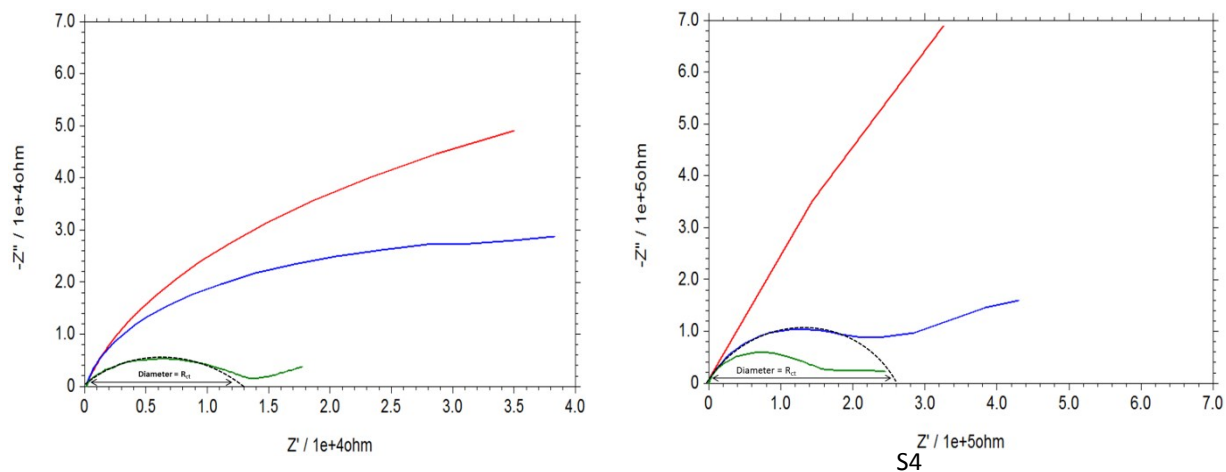

S5

**Figure S4.** Overlaid Nyquist plot of 0.1 mM glucose in 0.1 M phosphate buffer solution (pH = 7.0) using bare and modified gold electrodes.  $E_{ac} = 10$  mV, frequency range: 0.01-100000 Hz. [bare Au (blue curve),  $R_{CT} = 4.0 \times 10^4 \Omega$ ; PATP - Au (red curve),  $R_{CT} = 4.8 \times 10^4 \Omega$ ; [VO(acac)<sub>2</sub>]-PATP-Au (green curve),  $R_{CT} = 1.3 \times 10^4 \Omega$ ].

**Figure S5.** Overlaid Nyquist plot of 0.5 mM H<sub>2</sub>O<sub>2</sub> in 0.1 M phosphate buffer solution (pH = 7.0) using bare and modified gold electrodes.  $E_{ac} = 10$  mV, frequency range: 0.01-100000 Hz. [bare Au (blue curve),  $R_{CT} = 2.6 \times 10^5 \Omega$ ; PATP-Au (red curve),  $R_{CT} = 6.4 \times 10^5 \Omega$ ; [VO(acac)<sub>2</sub>]-PATP-Au (green curve),  $R_{CT} = 1.2 \times 10^5 \Omega$ ].

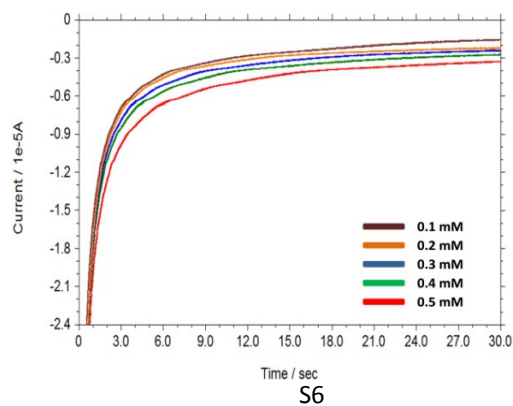

**Figure S6.** Chronoamperograms with increasing concentration of glucose (0.1 to 0.5 mM) in 0.1 M PBS (pH 7.0) at [VO(aca)<sub>2</sub>]-4-PATP-Au electrode at +0.65 V vs Ag/AgCl. LOD= 0.1 μM.

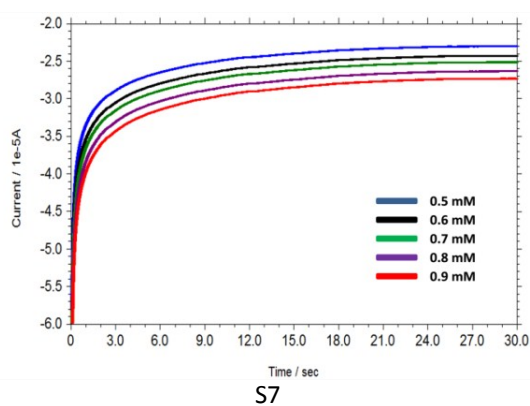

**Figure S7.** Chronoamperograms with increasing concentration of H<sub>2</sub>O<sub>2</sub> (0.5 to 0.9 mM) in 0.1 M PBS (pH 7.0) at [VO(acac)<sub>2</sub>]-4-PATP-Au electrode at -0.11 V versus Ag/AgCl. LOD = 0.03 μM.

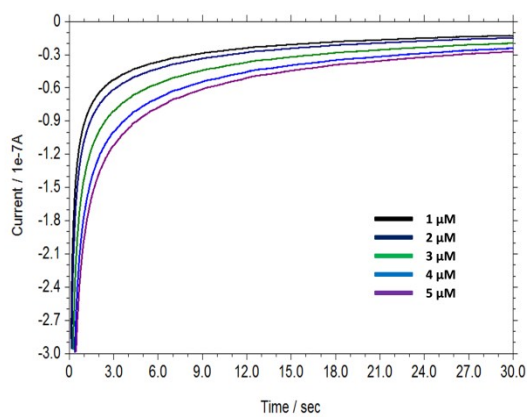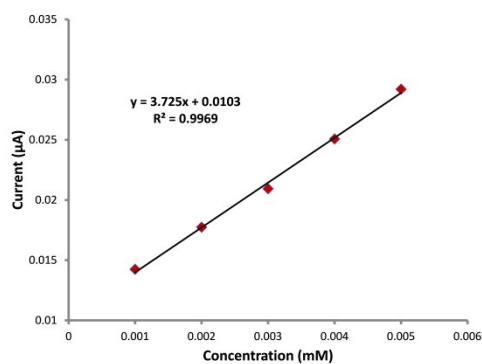

(a)

(b)

**Figure S8. (a)** Chronoamperograms with increasing concentration of glucose (1.0  $\mu\text{M}$  to 5.0  $\mu\text{M}$ ) in 0.1 M PBS (pH 7.0) at  $[\text{VO}(\text{acac})_2]$ -4-PATP-Au electrode at + 0.65 V *versus* Ag/AgCl. **(b)** Plot of concentration of glucose *versus* oxidation peak current. Detection limit 0.1  $\mu\text{M}$  (S/N = 3).

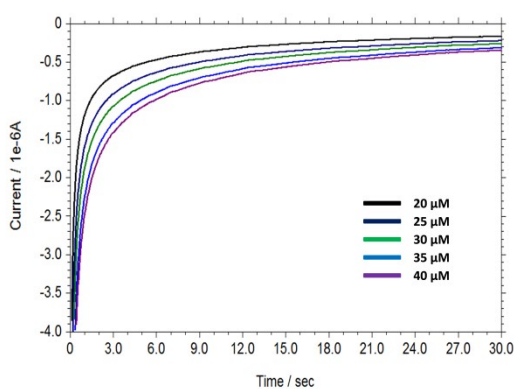

(a)

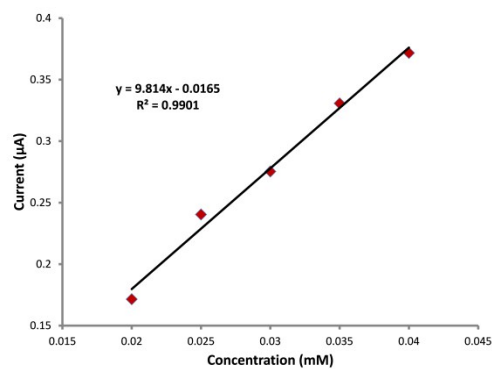

(b)

**Figure S9. (a)** Chronoamperograms with increasing concentration of  $\text{H}_2\text{O}_2$  (20 to 40  $\mu\text{M}$ ) in 0.1 M PBS (pH 7.0) at  $[\text{VO}(\text{acac})_2]$ -4-PATP-Au electrode at - 0.11 V *versus* Ag/AgCl. **(b)** Plot of concentration of  $\text{H}_2\text{O}_2$  *versus* reduction peak current. Detection limit 0.03  $\mu\text{M}$  (S/N = 3).

Detection limit of glucose and  $\text{H}_2\text{O}_2$  were obtained by using  $3\sigma/m$  where  $\sigma$  is the standard deviation of peak current in blank solution ( $n = 25$ ) and  $m$  is the slope of the calibration curve.

The S/N value was calculated by dividing the mean value of the currents by the standard deviation of the currents at low concentration of analyte in chronoamperometry.

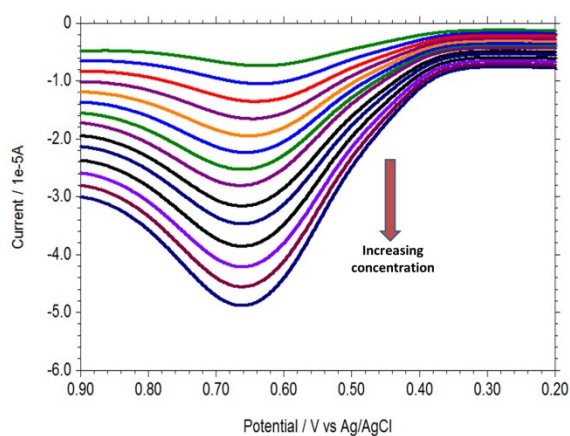

(a)

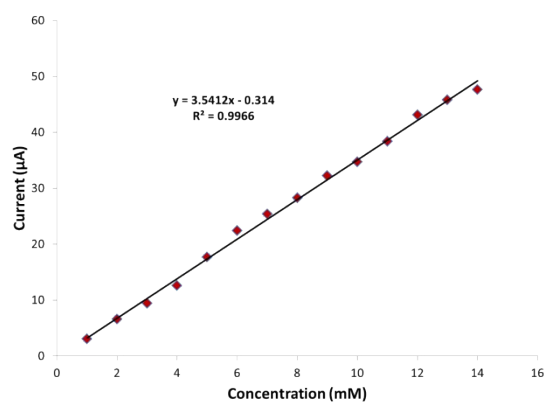

(b)

**Figure S10. (a)** Overlaid Differential pulse voltammogram with increasing glucose concentration (1-14 mM) in 0.1 M PBS (pH = 7.0) at  $[\text{VO}(\text{acac})_2]$ -PATP-Au electrode **(b)** Plot of current as a function of concentration of glucose with linear trend line ( $R^2 > 0.99$ )

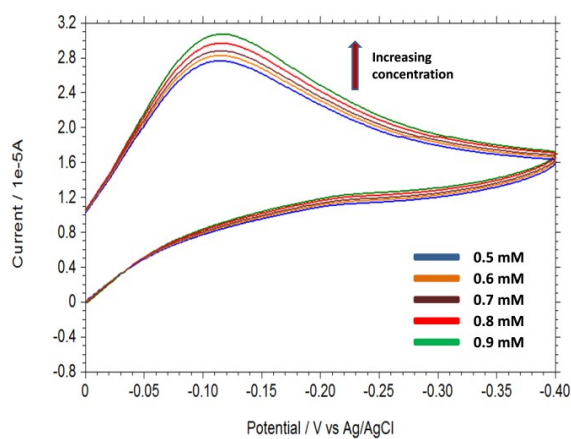

(a)

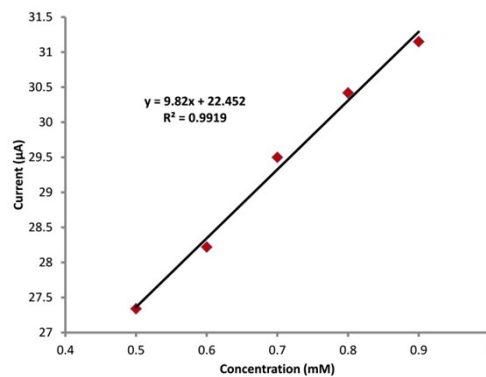

(b)

**Figure S11. (a)** Overlaid Cyclic voltammograms with increasing hydrogen peroxide concentration in 0.1 M PBS (pH = 7.0) at  $[\text{VO}(\text{acac})_2]$ -PATP-Au electrode **(b)** Plot of current as a function of concentration of hydrogen peroxide with linear trend line ( $R^2 > 0.99$ )

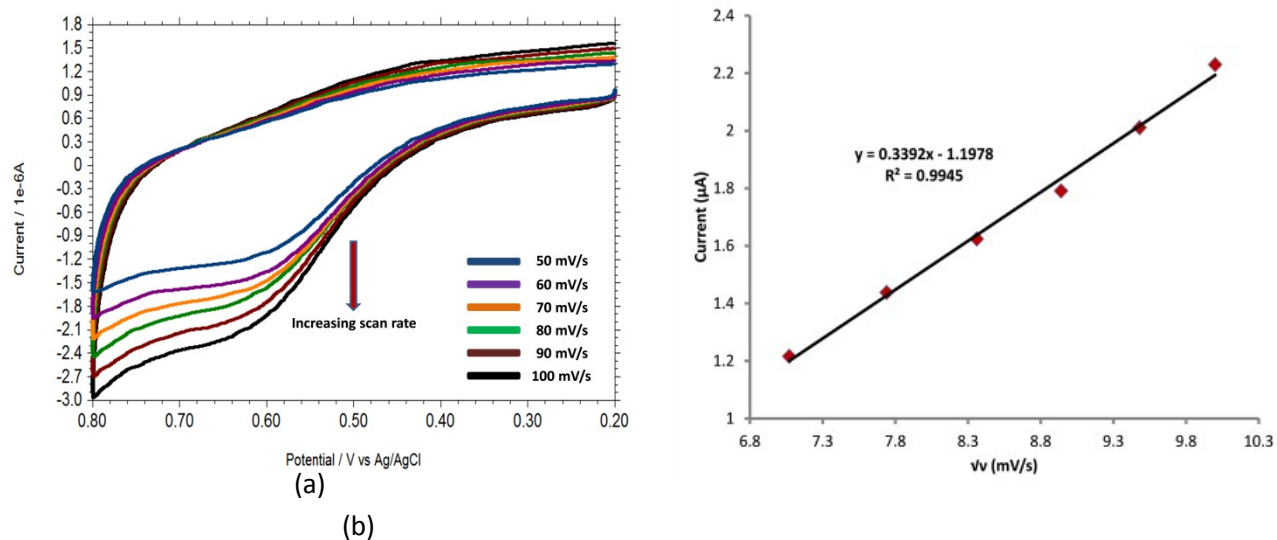

**Figure S12.** (a) Cyclic voltammograms of 0.1 mM glucose in 0.1 M PBS (pH 7.0) at different scan rate using [VO(acac)<sub>2</sub>]-PATP-Au electrode (b) Plot of oxidation peak current *versus* square root of scan rate.

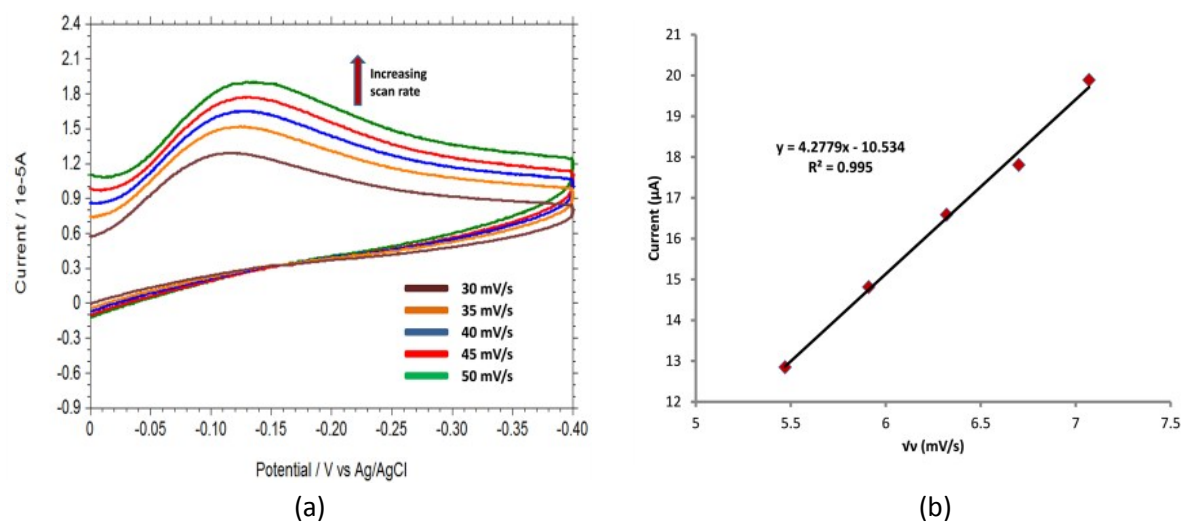

**Figure S13.** (a) Cyclic voltammograms of 0.5 mM H<sub>2</sub>O<sub>2</sub> in 0.1 M PBS (pH 7.0) at different scan rate using [VO(acac)<sub>2</sub>]-PATP-Au electrode (b) Plot of oxidation peak current of 0.5 mM H<sub>2</sub>O<sub>2</sub> *versus* square root of scan rate.

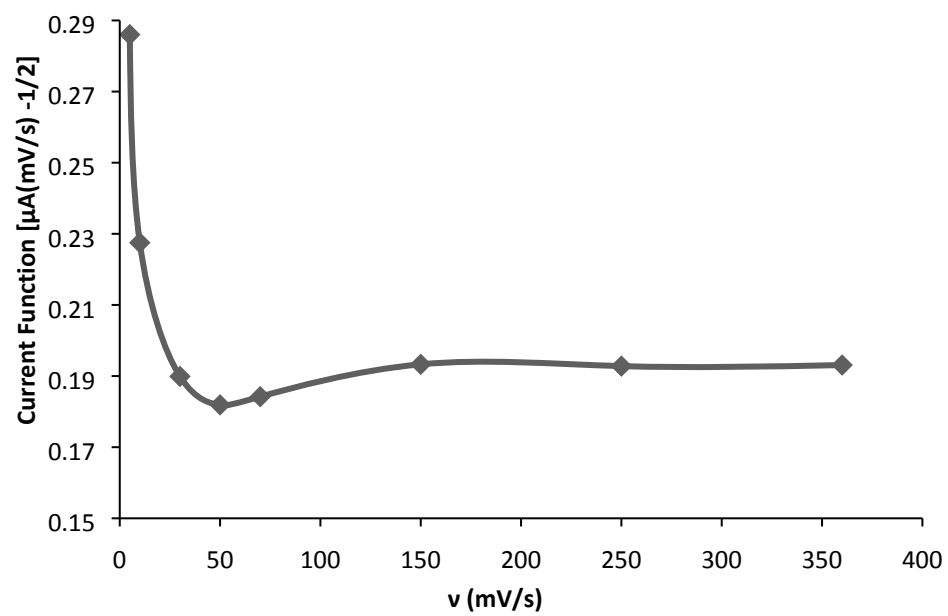

**Figure S14.** Plot of scan rate –normalized current ( $I_p/v^{1/2}$ ) with scan rate ( $v$ )

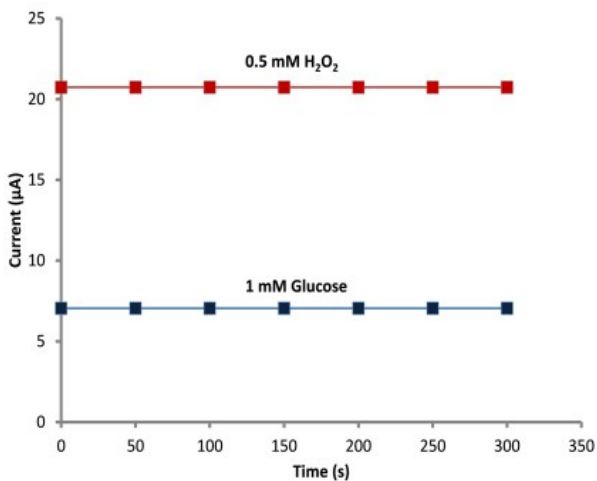

**Figure S15.** Plot of accumulation time *versus* oxidation peak current of glucose and reduction peak current of H<sub>2</sub>O<sub>2</sub> in 0.1 M PBS at pH 7 at [VO(acac)<sub>2</sub>]-PATP-Au electrode.

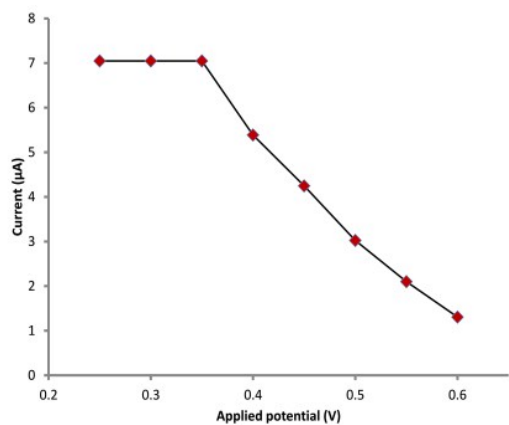

(a)

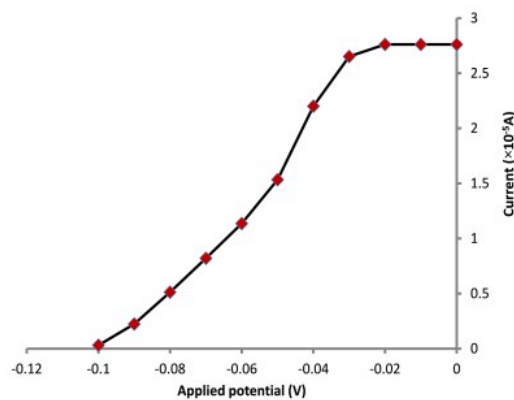

(b)

**Figure 16.** (a) Plot of applied potential *versus* oxidation peak current of 0.1 mM glucose in 0.1 M PBS (pH 7) at VO(acac)<sub>2</sub>-PATP-Au electrode. (b) Plot of applied potential *versus* reduction peak current of 0.5 mM H<sub>2</sub>O<sub>2</sub> in 0.1 M PBS (pH 7) at VO(acac)<sub>2</sub>-PATP-Au electrode.

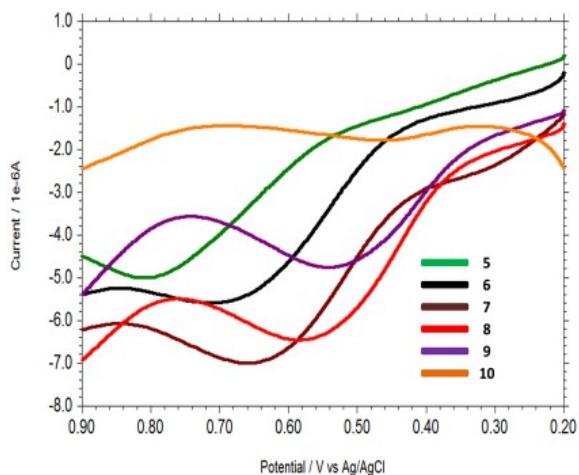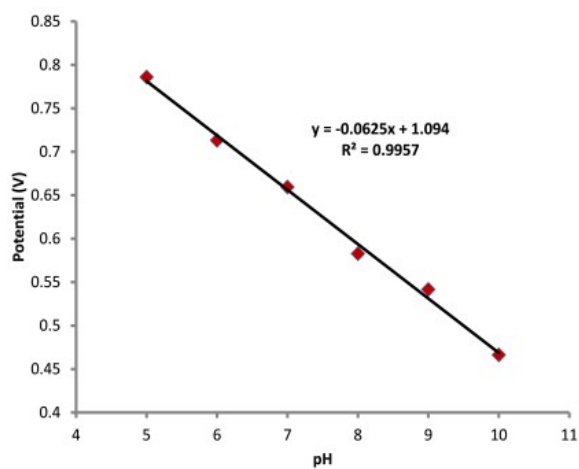



(a)

(b)

**Figure S17.** (a) Overlaid DPV of 0.1 mM glucose at different pH using [VO(acac)<sub>2</sub>]-PATP-Au electrode (b) Plot of oxidation peak potential of 0.1 mM glucose versus pH.

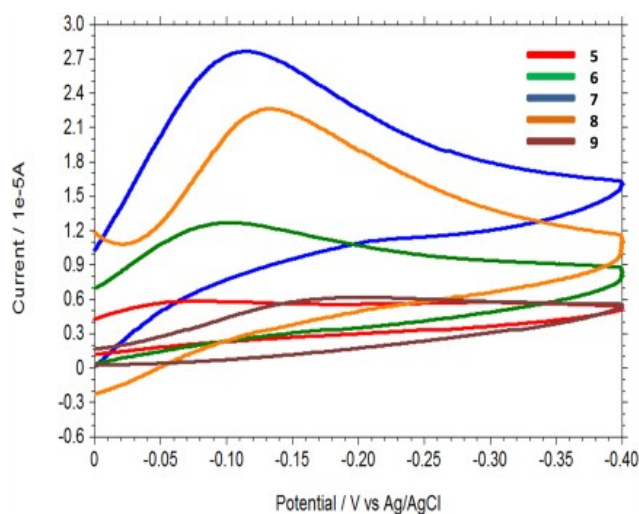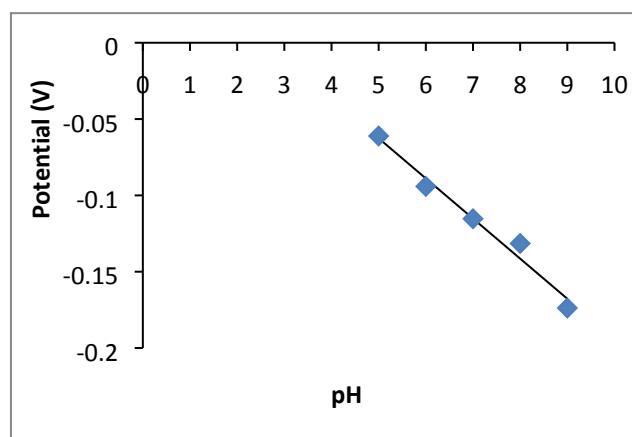

(a)

(b)

**Figure S18.** (a) Overlaid CV of 0.5 mM H<sub>2</sub>O<sub>2</sub> at different pH obtained with [VO(acac)<sub>2</sub>]-PATP-Au electrode in 0.1 M PBS. (b) Plot of reduction peak current of 0.5 mM H<sub>2</sub>O<sub>2</sub> versus pH.

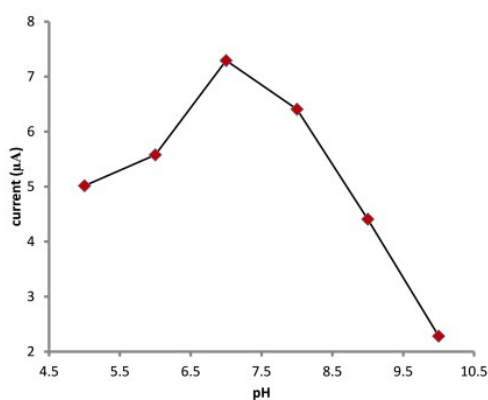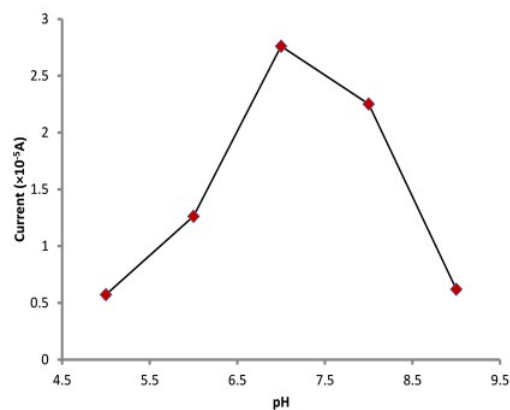

(a) (b)

**Figure S19.** (a) Plot of oxidation peak current of 0.1 mM glucose versus pH at [VO(acac)<sub>2</sub>]-PATP-Au electrode in 0.1 M PBS. (b) Plot of reduction peak potential of 0.5 mM H<sub>2</sub>O<sub>2</sub> versus pH at [VO(acac)<sub>2</sub>]-PATP-Au electrode in 0.1 M PBS.

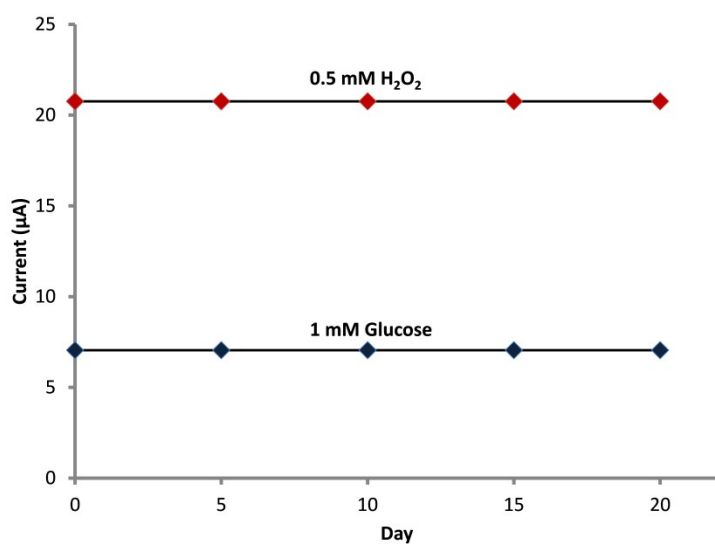

**Figure S20.** Plot of electrocatalytic current obtained for glucose and hydrogen peroxide with time using [VO(acac)<sub>2</sub>]-PATP-Au electrode.

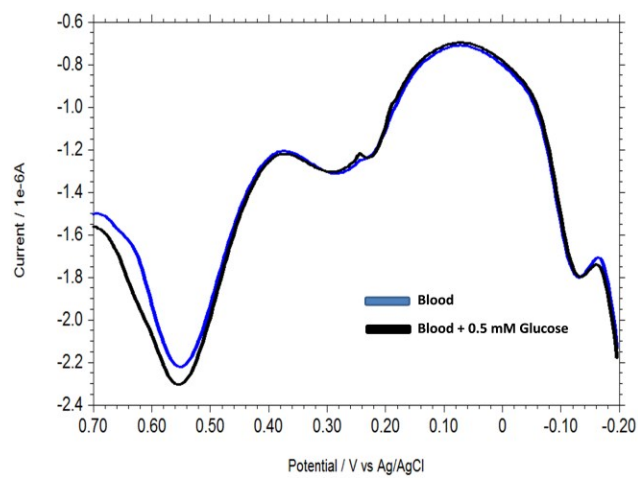

**Figure S21.** Overlaid DPVs of human blood sample solution and after addition of standard glucose solution in blood sample solution.

**Table S1.** Comparative account of different non-enzymatic electrochemical sensors for the determination of glucose and hydrogen peroxide

| Sensor | Glucose | Hydrogen peroxide |
|--------|---------|-------------------|
|--------|---------|-------------------|

|                                     | Linear range (mM) | Detection limit ( $\mu$ M) | Applied voltage (V, versus Ag/AgCl) | Medium             | Linear range (mM) | Detection limit ( $\mu$ M) | Applied voltage (V, versus Ag/AgCl) | Medium             | Reference    |
|-------------------------------------|-------------------|----------------------------|-------------------------------------|--------------------|-------------------|----------------------------|-------------------------------------|--------------------|--------------|
| Cu@M-Chit-CNT/GCE                   | 0.0005-1.0        | 0.05                       | + 0.5                               | 0.05 M NaOH        | 0.0001-1.0        | 0.025                      | - 0.25                              | PBS (pH 7.0)       | 1            |
| Cu <sub>2</sub> O/GNs/GCE           | 0.3 – 3.3         | 3.3                        | + 0.60                              | 0.1 M KOH          | 0.3-7.8           | 20.8                       | -0.4                                | 0.1 M PBS (pH 7.4) | 2            |
| CQDs/O <sub>h</sub>                 | 0.02-             | 8.4                        | + 0.60                              | 0.1 M NaOH         | 0.005-5.3         | 2.8                        | -0.2                                | 0.1 M PBS (pH 7.4) | 3            |
| Cu <sub>2</sub> O/Nafion/GCE        | 4.3               |                            |                                     |                    |                   |                            |                                     |                    |              |
| Mn <sub>3</sub> O <sub>4</sub> /3DG | 0.1 – 8           | 10                         | +0.4 0                              | 0.1 M NaOH         |                   |                            |                                     |                    | 4            |
| Au nanocoral/Au                     | 0.05 – 30.0       | 10                         | +0.2                                | 0.1M PBS (pH 7.4)  |                   |                            |                                     |                    | 5            |
| Au NW                               | 1– 8              | 0.05                       | -0.16                               | PBS (pH 9.2)       |                   |                            |                                     |                    | 6            |
| CoPcTs/PNPGC                        | 0.25 – 20         | 100                        | -                                   | 0.1 M NaOH         |                   |                            |                                     |                    | 7            |
| Ni(II)-Curcumin/GC                  | 0.001 - 10        | 0.1                        | +0.35                               | 0.1 M NaOH         |                   |                            |                                     |                    | 8            |
| poly[NiTRP]/GCE                     | 0.0025-1.0        | 360                        | + 0.47                              | 1M NaOH            |                   |                            |                                     |                    | 9            |
| CuHCF-AuNP/graphite wax             | 0.0086-1.2        | 0.13                       | + 0.59                              | 0.1 M KOH          |                   |                            |                                     |                    | 10           |
| Chitosan/AgNPs-G nano composite/GCE |                   |                            |                                     |                    | 0.1 - 10          | 7.0                        | -0.3                                | 0.2 M PBS (pH 7.4) | 11           |
| Ag-MnOOH-GO/GCE                     |                   |                            |                                     |                    | 0.0005 - 17.8     | 0.2                        | -0.2                                | 0.1 M PBS (pH 7.2) | 12           |
| CuO-SiNWs/GCE                       |                   |                            |                                     |                    | 0.01-13.18        | 1.6                        | -0.3                                | PBS (pH 7.0)       | 13           |
| CoOOH nanosheet/Co foil/Au          |                   |                            |                                     |                    | 0-1.6             | 40                         | + 0.1                               | 0.1M NaOH          | 14           |
| Fe(III)-MPBA-nanoporous gold/Au     |                   |                            |                                     |                    | 0.0009 – 0.5      | 0.001                      | -                                   |                    | 15           |
| DNA-Cu(II)/GCE                      |                   |                            |                                     |                    | 0.0008 – 4.5      | 0.25                       | -0.25                               |                    | 16           |
| [VO(acac) <sub>2</sub> ]-PATP/Au    | 0.1-0.5           | 0.1                        | +0.65                               | 0.1 M PBS (pH 7.0) | 0.5 – 0.9         | 0.03                       | - 0.11                              | 0.1 M PBS (pH 7.0) | Present work |

Cu@M-Chit-CNT: Cu nanoparticles decorate on the modified chitosan–CNT; Cu<sub>2</sub>O/GNs: Cu<sub>2</sub>O nanocubes wrapped by graphene nanosheets); CQDs/O<sub>h</sub> Cu<sub>2</sub>O: carbon quantum dots (CQDs)/octahedral cuprous oxide(Cu<sub>2</sub>O) nanocomposites; 3DG: Three dimensional graphene; Au NW: gold nanowire array electrode; CoPcTs (cobalt (II) phthalocyanine tetrasulfonate); PNPGC: polypyrrole nanofiber onto pencil graphite electrode; poly[NiTRP]: polymeric tetra-ruthenated nickel porphyrin films; CuHCF: Cu hexacyano ferrate; MPBA: 4-mercapto-3-(phosphonomethylamino) butanoic acid, AgNPs-G: Ag nanoparticles-graphene; Ag-MnOOH-GO: Silver nanoparticle- manganese oxyhydroxide- graphene oxide; SiNWs: silicon nanowires.

**Table S2.** Determination of glucose in blood sample and H<sub>2</sub>O<sub>2</sub> in processed milk with [VO(acac)<sub>2</sub>]-4-PATP modified gold electrode

| Analyte | Sample | Detected | Spiked | Found | RSD <sup>a</sup> | Recovery |
|---------|--------|----------|--------|-------|------------------|----------|
|---------|--------|----------|--------|-------|------------------|----------|

|                               |       |         |        |         | (%)  | (%)   |
|-------------------------------|-------|---------|--------|---------|------|-------|
| Glucose                       | Blood | 5.01 mM | 0.5 mM | 0.51 mM | 2.24 | 100.2 |
| H <sub>2</sub> O <sub>2</sub> | Milk  | 0.91 μM | 1 μM   | 1.01 μM | 2.16 | 101.0 |

<sup>a</sup> Five times measurements were taken

## References

1. Ensafi, A. A.; M. Jafari-Asl, N. Dorostkar, M. Ghiaci, M. Victoria Mart'inez-Huerta and J. L. G. Fierro, The fabrication and characterization of Cu-nanoparticle immobilization on a hybrid chitosan derivative-carbon support as a novel electrochemical sensor: application for the sensitive enzymeless oxidation of glucose and reduction of hydrogen peroxide. *J. Mater. Chem. B* **2014**, *2*, 706 - 717.
2. Liu, M.; Liu, R.; Chen, W. Graphene wrapped Cu<sub>2</sub>O nanocubes: non-enzymatic electrochemical sensors for the detection of glucose and hydrogen peroxide with enhanced stability. *Biosens. Bioelectron.* **2013**, *45*, 206 - 212.
3. Li, Y.; Zhong, Y.; Zhang, Y.; Weng, W.; Li, S. Carbon quantum dots/octahedral Cu<sub>2</sub>O nanocomposites for non-enzymatic glucose and hydrogen peroxide amperometric sensor. *Sensors and Actuators B* **2015**, *206*, 735 - 743.
4. Si, P.; Dong, X. C.; Chen, P.; Kim, D. H. A hierarchically structured composite of Mn<sub>3</sub>O<sub>4</sub>/3D graphene foam for flexible nonenzymatic biosensors. *J Mater Chem B* **2013**, *1*, 110–115
5. Cheng, T-M.; Huang, T-K.; Lin, H-K.; Tung, S-P.; Chen, Y-L.; Lee, C-Y.; Chiu, H-T. (110)-Exposed Gold Nanocoral Electrode as Low Onset Potential Selective Glucose Sensor. *ACS Appl. Mater. Interfaces* **2010**, *2*, 2773–2780.
6. Cherevko, S.; Chung, C. H. Gold nanowire array electrode for non-enzymatic voltammetric and amperometric glucose detection. *Sens Actuators B* 2009, *142*, 216–223.
7. Ozcan, L.; Sahin, Y.; Turk, H. Non-enzymatic glucose biosensor based on overoxidized polypyrrole nanofiber electrode modified with cobalt(II) phthalocyanine tetrasulfonate. *Biosens. Bioelectron.* **2008**, *24*, 512 -517.
8. Elahi, M. Y.; Heli, H.; Bathaie, S. Z.; Mousavi, M. F. Electrocatalytic oxidation of glucose at a Ni-curcumin modified glassy carbon electrode. *J. Solid State Electrochem.* **2007**, *11*, 273 - 282.
9. Quintino, M. d. S. M.; Winnischofer, H.; Nakamura, M.; Araki, K.; Toma, H. E.; Angnes, L. Amperometric sensor for glucose based on electrochemically polymerized tetra-ruthenated nickel-porphyrin. *Anal. Chim. Acta* **2005**, *539*, 215 - 222.

10. Sivasankari, G.; Priya, C.; Narayanan, S. S. Non-enzymatic amperometric glucose biosensor based on copper hexacyanoferrate-film modified- GNP-graphite composite electrode. *Int. J. Pharm. Bio. Sci.*, **2012**, 2, 188 - 195.
11. Zhang, Y.; Liu, S.; Wang, L.; Qin, X.; Tian, J.; Lu, W.; Chang, G.; Sun, X. One-pot green synthesis of Ag nanoparticles-graphene nanocomposites and their applications in SERS, H<sub>2</sub>O<sub>2</sub>, and glucose sensing. *RSC Advances*, **2012**, 2, 538 - 545.
12. Bai, W.; Nie, F.; Zheng, J.; Sheng, Q. Novel Silver Nanoparticle–Manganese Oxyhydroxide–Graphene Oxide Nanocomposite Prepared by Modified Silver Mirror Reaction and Its Application for Electrochemical Sensing. *ACS Appl. Mater. Interfaces* **2014**, 6, 5439–5449.
13. Huang, J.; Zhu, Y.; Zhong, H.; Yang, X.; Li, C. Dispersed CuO Nanoparticles on a Silicon Nanowire for Improved Performance of Nonenzymatic H<sub>2</sub>O<sub>2</sub> Detection. *ACS Appl. Mater. Interfaces* 2014, 6, 7055–7062
14. Lee, K. K.; Loh, P. Y.; Sow, C. H.; Chin, W. S.; CoOOH nanosheet electrodes: Simple fabrication for sensitive electrochemical sensing of hydrogen peroxide and hydrazine. *Biosens. Bioelectron.* **2013**, 39, 255–260.
15. Zheng, M.; Li, P.; Yang, C.; Zhu, H.; Chen, Y.; Tang, Y. W.; Zhou, Y. M.; Lu, T. H. Ferric ion immobilized on three-dimensional nanoporous gold films modified with self-assembled monolayers for electrochemical detection of hydrogen peroxide. *Analyst* 2012, 137, 1182–1189
16. Zeng, X.; Liu, X.; Kong, B.; Wang, Y.; Wei, W. A sensitive nonenzymatic hydrogen peroxide sensor based on DNA–Cu<sup>2+</sup> complex electrodeposition onto glassy carbon electrode. *Sens Actuators B* **2008**, 133, 381 - 386.
